# Supplementary material for: The structure and functional profile of ruminal microbiota in young and adult reindeers (Rangifer tarandus) consuming natural winter-spring and summer-autumn seasonal diets
Source: PeerJ. 2021 Nov 24;9:e12389. doi: 10.7717/peerj.12389 (PMC8627130; doi:10.7717/peerj.12389)
Supplement: Supplemental Information 2 — The raw data is showing the raw measurements of biochemical composition of summer–autumn (CS and AS treatments) and winter–spring (CW and AW treatments) pasture diets of calves and adult reindeer. [file peerj-09-12389-s002.xlsx]

## Sheet: Лист1
	S (CS3, AS3)	±	W (CW3, AW5)	±	p-value		N
Dry matter (DM), %	76.7	1.6	76.5	2.72		cw	3
Crude fiber (g/kg of DM)	142.8	6.31	174.8	7.2	≤0,05	cs	3
Soluble carbohydrates (sugars)	20.8	0.8	32.4	1.41	≤0,05	aw	5
Crude fat (g/kg of DM)	16.9	0.61	7.7	1.89	≤0,05	as	3
Crude protein (g/kg of DM)	95.9	4.75	24.2	1.74	≤0,001
Crude ash (g/kg of DM)	36.4	1.12	34.8	1.4
Metabolizable energy (MJ/kg of DM)	9.44	0.45	8.92	0.42
	1	2	3	4	5	6			1	2	3	4	5	6	7	8
	cs1	cs2	cs3	as1	as2	as3	mean	Standard Error of the Mean (SEM)	cw1	cw2	cw3	aw1	aw2	aw3	aw4	aw5	mean	Standard Error of the Mean (SEM)	t.test (Student's t-Tes)
Dry matter (DM), %	75.84	78.61	80.31	80.19	71.93	73.32	76.7	1.59721	75.66	79.84	63.37	77.43	81.16	87.23	77.13	70.18	76.5	2.71921	p-value = 0,9469
Crude fiber (g/kg of DM)	155.29	127.52	146.28	123.23	156.38	148.08	142.797	6.31464	145.53	169.9	165.02	173.94	203.27	200.59	174.76	165.41	174.803	7.20115	p-value = 0,00358
Soluble carbohydrates (sugars)	20.36	22.95	19.8	19.52	23.13	19.05	20.8017	0.798646	34.06	32.32	38.3	25.41	34.4	32.64	29.75	32.31	32.3987	1.41075	p-value = 0,00001213
Crude fat (g/kg of DM)	17.32	18.49	14.83	16.88	15.86	18.02	16.9	0.610763	5.64	17.04	6.73	4.03	5.47	1.59	8.17	12.91	7.6975	1.89284	p-value = 0.000981
Crude protein (g/kg of DM)	107.33	98.85	94.79	103.34	76.78	94.3	95.8983	4.75002	19.5	22.39	29.74	32.14	24.77	24.32	20.62	20.15	24.2037	1.7418	p-value = 0,00000253
Crude ash (g/kg of DM)	34.77	38.32	35.24	34.71	40.64	34.69	36.395	1.12154	33.51	30.86	34.27	32.13	40.96	31.11	38.73	36.81	34.7975	1.39711	p-value = 0.355
Metabolizable energy (MJ/kg of DM)	9.93	9.57	10.68	9.38	9.46	7.61	9.43833	0.453761	9.45	8.04	9.46	9.06	7.6	10.48	9.83	7.45	8.92125	0.417267	p-value = 0.3824
